1  
2  
3  
4  
5  
6  
7  
8  
9  
10  
11  
12  
13  
14  
15  
16  
17  
18  
19  
20  
21  
22  
23  
24  
25  
26  
27  
28  
29  
30

ALTERED MOLECULAR PATHWAYS OBSERVED IN NASO-OROPHARYNGEAL SAMPLES OF SARS-CoV-2 PATIENTS

Emel Akgun<sup>1,2</sup>, Mete Bora Tuzuner<sup>2</sup>, Betul Sahin<sup>2</sup>, Meltem Kilercik<sup>1,2</sup>, Canan Kulah<sup>2</sup>, Hacer Nur Cakiroglu<sup>2</sup>, Mustafa Serteser<sup>1,2</sup>, Ibrahim Unsal<sup>2</sup>, Ahmet Tarik Baykal<sup>1,2\*</sup>

<sup>1,\*</sup> Department of Medical Biochemistry, Faculty of Medicine, Acibadem University, Istanbul, Turkey.

<sup>2</sup> Acibadem Labmed Clinical Laboratories, Istanbul, Turkey.

\*To whom correspondence may be addressed: Assoc. Prof. Ahmet Tarik Baykal, PhD, Acibadem University, Department of Medical Biochemistry, School of Medicine, Icerenkoy Mah. No:32, Kayisdagi Cad., 34752 Ataşehir, Istanbul, Turkey, Tel: +902165004828, Fax: +902165443940, E-mail: [ahmet.baykal@acibadem.edu.tr](mailto:ahmet.baykal@acibadem.edu.tr)

**Abstract**  
NOTE: This preprint reports new research that has not been certified by peer review and should not be used to guide clinical practice.

31

32 **Background:** COVID-19 or severe acute respiratory syndrome coronavirus 2 (SARS-CoV-2)  
33 appeared throughout the World and currently affected more than 3.6 million people and  
34 caused the death of around 252,000 people. The novel strain of the coronavirus disease is  
35 transmittable at a devastating rate with a high rate of severe hospitalization even more so for  
36 the elderly population. Currently around 50,000 patients are in a seriously critical situation.  
37 Although 1.2 million patients recovered from the disease there are still more than 2.1 Million  
38 active cases. Naso-oro-pharyngeal swab samples as the first step towards detecting suspected  
39 infection of SARS-CoV-2 provides a non-invasive method for PCR testing at a high  
40 confidence rate. Furthermore, proteomics analysis of PCR positive and negative naso-  
41 oropharyngeal samples provides information on the molecular level which highlights disease  
42 pathology.

43 **Method:** Samples from 15 PCR positive cases and 15 PCR negative cases were analyzed with  
44 nanoLC-MS/MS to identify the differentially expressed proteins.

45 **Results:** Proteomic analyses identified 207 proteins across the sample set and 17 of them  
46 were statistically significant. Protein-protein interaction analyses emphasized pathways like  
47 Neutrophil degranulation, Innate Immune System, Antimicrobial Peptides.

48 **Conclusion:** Neutrophil Elastase (ELANE), Azurocidin (AZU1), Myeloperoxidase (MPO),  
49 Myeloblastin (PRTN3), Cathepsin G (CTSG) and Transcobalamine-1 (TCN1) were found to  
50 be significantly altered in naso-oropharyngeal samples of SARS-CoV-2 patients. The  
51 identified proteins are linked to alteration in the innate immune system specifically via  
52 neutrophil degranulation and NETosis.

53

54 **Keywords:** SARS-CoV-2, Neutrophil Degranulation, Proteinase-3, Myeloperoxidase,  
55 ANCA, NETosis

56

## 57 **1. Background**

58

59 Severe acute respiratory distress syndrome-associated coronavirus-2 (SARS-CoV-2) also  
60 known as COVID-19 first appeared in Wuhan, Hubei, China in December 2019, and now it is  
61 widespread around the World. The replication of the virus is through the human airway  
62 epithelial cells where it targets the receptors of human Angiotensin-Converting Enzyme 2  
63 (ACE-2). The high mortality observed in COVID-19 is associated with severe acute  
64 respiratory distress and systemic coagulopathy. Many COVID-19 patients show a postponed  
65 onset of respiratory issues but then develop into more severe situations. We wanted to  
66 investigate the molecular changes in the COVID-19 patients' naso-oropharyngeal swab  
67 samples via comparison to the proteome of PCR negative cases. Our goal is to find pathways  
68 associated with the site of infection through proteomics analysis. 17 statistically significant  
69 protein alterations lead us specifically to neutrophil degranulation pathways.

70 During airway infections, Neutrophils are the first wave of defense that also defines the  
71 disease outcome. Neutrophils have multiple functions in viral infections such as inactivation  
72 of the virus, achieved by phagocytosis, ROS production, proteolytic enzyme release, NET  
73 activation (NETosis, Neutrophil Extracellular Traps). Neutrophils also interact with immune  
74 cells and secreting cytokines participate in eliciting an antiviral response.

75 Neutrophil granulocytes express several enzymes linked to controlling host infection. As the  
76 cytotoxic molecules are released from the granules they have an impact on the inflammatory  
77 response. Such adverse molecules cause severe damage to the host where it exhibits itself as  
78 perivascular infiltrates around the capillaries in the lungs as observed in SARS-CoV-2  
79 patients. The identified up-regulated proteins Neutrophil Elastase, Azurocidin,  
80 Myeloperoxidase, Myeloblastin, Cathepsin G, and Transcobalamine-1 (TCN1, AZU1, CTSG,

81 PRTN3, MPO, ELANE) in naso-oropharyngeal swab samples are discussed to highlight the  
82 molecular mechanism changes in the site of infection.

83

## 84 **2. Study design**

85

### 86 **2.1. Study Population and Sample Collection**

87

88 Samples were collected using a nasal and oropharyngeal (NUCLISWAB) swab (Salubris,  
89 Turkey) and were placed in a tube with Universal Transport Media. After collection the  
90 samples were stored at -80 °C before proteomics analysis. The study group consists of 15  
91 PCR positive and 15 negative cases. Informed consent was sought from each accepted to  
92 enter the study and ethical approval for the conduct of the study was given by Acibadem  
93 Mehmet Ali Aydinlar University Human Scientific and Ethical Review Committee (Approval  
94 ID: 2020-07/9).

### 95 **2.2. COVID-19 RT-PCR Test**

96 For molecular testing of SARS-CoV-2;

97 The extraction of nucleic acids from the samples was performed by a manual liquid phase  
98 method using Bio-Speedy Nucleic Acid Isolation Kit (Bioeksen, Turkey). Nucleic acid  
99 amplification test (NAT) was carried out by Bio-Speedy COVID-19 RT-qPCR Detection Kit  
100 (Bioeksen, Turkey) according to the manufacturer's instructions on RotorGene (Qiagen,  
101 Germany) Real-Time PCR instrument. The test briefly achieves a one-step reverse  
102 transcription (RT) and real-time PCR (qPCR) targeting SARS-CoV-2 specific RdRp (RNA-  
103 dependent RNA polymerase) gene fragment

### 104 **2.3. LC-MSMS Analysis**

105

106 A shorter sample preparation approach was applied to obtain the tryptic peptides for analyses.  
107 50 ul of the naso-oropharyngeal transport solution was taken and lyophilized. The powder  
108 was reconstituted in 20ul of 50 mM Ammonium bicarbonate solution with 1 ul of protease  
109 inhibitor mixture (Thermo Scientific). The mixture was centrifuged at 14000 xg for 10 min  
110 and the supernatant was transferred to a clean Eppendorf tube. DTT was added to 10 mM  
111 final concentration and incubated at 60°C for 10 min. The mixture was alkylated in dark for  
112 30 min with 20mM IAA. To the resulting mixture 1 ug of sequencing grade trypsin (Promega  
113 Gold) was added and incubated at 55°C for 1.5 hrs. The digest was acidified with 1 ul formic  
114 acid and transferred to an LC vial for injection. The samples were analyzed by the protocols  
115 in our previous studies [1]. Briefly, tryptic peptides were trapped on a Symmetry C18  
116 (5µm,180µm i.d. × 20 mm) column and eluted with ACN gradient (4% to 40% ACN, 0.3  
117 ul/min flow rate) with a total run time of 60 min on a CSH C18 (1.7 µm, 75 µm i.d. × 250  
118 mm) analytical nano column. Data were collected in positive ion sensitivity mode using a  
119 novel data-independent acquisition mode (DIA) coined as SONAR [2] with a quadrupole  
120 transmission width of 24 Da. Progenesis-QIP (V.2.4 Waters) was used for data processing.

#### 121 **2.4. PPI Network and Pathway Analysis**

122 Protein-protein interaction networks functional enrichment analysis was carried out using the  
123 STRING (<http://string-db.org/>, v11.0) database with the highest confidence interaction score  
124 level to identify possible pathways related to the identified proteins. Textmining, experiments,  
125 databases co-expression, neighborhood, gene fusion, and co-occurrence selected as active  
126 interaction sources. The minimum interaction score was set to high (high confidence=0.700).  
127 REACTOME (<http://www.reactome.org>) pathways analysis tool was also used for  
128 processing.

### 129 **3. Results**

#### 130 **3.1. Label-free Proteomics**

131 Proteins were extracted from a small amount of naso-oropharyngeal samples, fast tryptic  
132 digestion was applied and followed with a 60 min reverse-phase separation. NanoLC-MSMS  
133 analysis provided the identification of 207 protein groups with high confidence (<1% FDR).  
134 Statistical analysis done in Progenesis QIP software identified 17 proteins to be statistically  
135 significantly expressed in patients' naso-oropharyngeal samples (Table 1).

136

### 137 **3.2. Bioinformatic Analysis**

138 Pathway analysis of the significantly altered protein levels between COVID-19 positive and  
139 negative patients' naso-oropharyngeal swab samples were analyzed using the STRING online  
140 database. The PPI network obtained, contained 17 differentially expressed proteins with 15  
141 nodes (disconnected nodes were not shown) and 14 edges as shown in Figure 1A. The main  
142 cluster includes Neutrophil Elastase (ELANE), Azurocidin (AZU1), Myeloperoxidase  
143 (MPO), Myeloblastin (PRTN3), Cathepsin G (CTSG) and Transcobalamine-1 (TCN1). The  
144 abundance of these proteins were found to be increased in COVID-19 positive patient  
145 samples compared to negative ones. REACTOME pathway enrichment analyses of the  
146 differentially expressed proteins were performed. Nine of the proteins were primarily  
147 associated with the immune system pathway. Proteins clustered in the PPI network were  
148 mainly enriched in the neutrophile degranulation pathway (HSA-6798695, FDR=2.01E-7)  
149 which is a subpathway of the innate immune system (Figure 1B).

150

### 151 **4. Discussion**

152 Neutrophils play a vital role in airway infections and may also define the disease outcome and  
153 carry out various functions in viral infections ranging from phagocytosis, degranulation to the  
154 generation of neutrophil extracellular traps (NETs) [3]. Neutrophils also interact with the  
155 immune cells and secreting cytokines participate in eliciting the antiviral response.

156 Degranulation mechanism is part of the innate immune system which is necessary for the  
157 fight against infection and provides the neutrophils with the necessary tools. In COVID-19  
158 patients, it was argued that the interlink between the innate and adaptive immune system may  
159 increase the severity and mortality of the disease [4]. Granules in neutrophils carry  
160 synthesized antimicrobial molecules and the content differs depending on the stage of  
161 maturation [5], depending on their contents they are named as azurophilic, gelatinase  
162 granules, specific, and secretory vesicles [6].

163  
164 In SARS-CoV-2 patients' naso-oropharyngeal samples, we have identified azurophilic  
165 granule (AG) proteins like Myeloperoxidase (MPO), elastase (ELANE), cathepsin G (CTSG),  
166 azurocidin 1 (AZU1) and proteinase 3 (PRTN3) to be highly overexpressed. Azurophilic  
167 neutrophils undergo limited exocytosis when activated [7] and their primary role is believed  
168 to be killing and degradation of engulfed microbes in the phagolysosome [8]. Although  
169 neutrophil degranulation having a positive impact on clearance of SARS-CoV-2 from the  
170 nasopharynx, in the inflammation microenvironment the process is broken and may lead to  
171 tissue damage by the secreted molecules from the granules. naso-oropharyngeal samples of  
172 COVID-19 patients demonstrate an increased level of both PRTN3 and MPO. PRTN3, a  
173 serine protease enzyme that is involved in granulocyte differentiation is expressed in the  
174 neutrophil granulocytes [9]. Promyelocyte proliferation is inhibited by PR3 expression that  
175 leads to neutrophil differentiation [10]. PRTN3 has various catalytic functions like cleavage  
176 of extracellular matrix and antiinflammatory proteins and activation of cytokines. MPO which  
177 is also expressed in neutrophil granulocytes can generate chlorine oxidants to kill infection  
178 agents [11]. Anti-neutrophil cytoplasmic antibodies (ANCA) autoantibodies specifically  
179 target azurophil proteins like PRTN3 and MPO and their role in numerous autoimmune  
180 disorders are discussed but primary focuses is systemic vasculitis where blood vessels are

181 destroyed via inflammation [10]. ANCA with cytoplasmic staining pattern against PRTN3 (c-  
182 ANCA) is seen in granulomatosis with polyangiitis (GPA) whereas perinuclear staining  
183 pattern against MPO (p-ANCA) is seen in eosinophilic granulomatosis with polyangiitis  
184 (EGPA), microscopic polyangiitis (MPA), and pauci-immune idiopathic crescentic  
185 glomerulonephritis [12]. Vascular endothelium in GPA patients are damaged by neutrophils  
186 that actively participate in autoimmune response [13]. Vasculitis risk in patients increases  
187 with PRTN3 positive neutrophils [14]. PRTN3 is expressed on the surface of the neutrophils  
188 and the ANCAs that target PRTN3 causes pro-inflammatory effects [9]. The increased  
189 PRTN3 and MPO production in the neutrophils of COVID-19 patients are the target for anti-  
190 neutrophil cytoplasmic antibodies. Increased PRTN3 was shown to have a negative effect on  
191 the resolution of inflammation that causes immune system deregulation [15]. In a mouse  
192 study, ANCAs that target MPO were injected through IV and it triggered extra capillary  
193 glomerulonephritis [16]. Neutrophil apoptosis is necessary in the resolution of inflammation  
194 [17]. The resolution of inflammation and tissue repair processes are aided by the cytokines  
195 released from macrophages during phagocytosis of the neutrophils [10]. The dysregulation in  
196 the macrophage orchestrated phagocytosis and neutrophil apoptosis mechanisms leads to  
197 inflammation [18]. Patients with ANCA originated vasculitis are more prone to apoptosis as a  
198 result of ANCA activation [19]. PRTN3 is reported as a signal that sustains the inflammatory  
199 microenvironment [9]. The overexpression of PRTN3 observed in COVID-19 patients may  
200 impair the resolution of inflammation during neutrophil apoptosis. It is argued that the  
201 recruited neutrophils to the site of inflammation get activated and the release of uncontrolled  
202 mediators may cause tissue damage. The inflammation seen in vasculitis is converted to  
203 necrotizing vasculitis via the release of toxic mediators due to early neutrophil apoptosis and  
204 also by decreased level of apoptotic neutrophil clearance by macrophages [10]. PRTN3 was



205 also reported to interfere with complement protein C1-q mediated clearance of Apoptotic  
206 Cells [20].

207 NETosis is a type of programmed cell death where neutrophil extracellular traps are formed  
208 [21]. NETs were identified in 2004 and they are often overlooked as drivers of severe  
209 pathogenic inflammation [22]. NETs have pathogen killing properties and include strands of  
210 DNA wrapped with histones and are enriched with neutrophil proteins like MPO and ELANE  
211 [23]. PRTN3, ELANE, and CTSG are coined as neutrophil serine proteases (NSP) and have  
212 tissue degrading and microbial killing effects [24]. NSP's active role in neutrophil-associated  
213 lung inflammatory and tissue-destructive diseases has been reported [25]. Increased  
214 expressions of PRTN3, ELANE, and CTSG was reported in COPD patients [26]. In a mouse  
215 model study ELANE or PRTN3 was introduced to the trachea which caused tissue destruction  
216 and enlargement in airspace [27]. ELANA expression was also implicated in the impairment  
217 of host defense resulting in a decrease in mucociliary clearance of bacteria and also pathogens  
218 phagocytosis [28]. CD2, CD4, and CD8 can be cleaved on the surface of T-cells by ELANE  
219 and CTSG that dysregulate T-cell Function [29]. It was reported that patients that lack alpha-1  
220 antitrypsin ( $\alpha 1$ -Pi) which is the physiological inhibitor of PRTN3 and ELANE carries a high  
221 risk of developing emphysema [30]. Azurophil granules also carry Cathepsin D which was  
222 reported to be up-regulated in the pulmonary macrophages in a mouse model of cigarette  
223 smoking [31]. Severe COPD cases exhibited MPO positive cells as a signal of neutrophil  
224 activation [32]. On the other hand in a mouse model of influenza it was shown that the  
225 inflammation damage was reduced by the absence of MPO [33]. IL-32, a proinflammatory  
226 cytokine with four isoforms, cleavage by PRTN3 propagates cytokine activity and triggers IL-  
227 1beta, TNF-alpha, IL-6, and chemokines [34]. It was argued that the targeted inhibition of  
228 PR3 or silencing of IL-32 by an inactive form of PRTN3 may halt the IL-32 driven immune  
229 dysregulation [34]. NSPs like ELANE, CTSG, and PRTN3 can cleave pro-IL-1beta to

230 bioactive IL-1beta [35]. Caspase-1/Interleukin-1 converting enzyme (ICE) cleaves proteins  
231 like precursors of the inflammatory cytokines interleukin 1 $\beta$  and interleukin 18 into their  
232 mature biologically active forms [36] and CTSG regulates Caspase-1 in this pathway [37].  
233 ICE has an active role in cell immunity as an initiator of inflammatory response so once  
234 activated it triggers the formation of active IL-1beta which is secreted from the cell that  
235 induces inflammation in the neighboring cells [38]. It was recently reported that infection in  
236 COVID-19 patients with acute respiratory syndrome showed release of the pro-inflammatory  
237 cytokines like IL-1beta and IL-6 [39]. Through the available literature, we can see that the up-  
238 regulation of various proteins observed in the naso-oropharyngeal swab samples of COVID-  
239 19 patients is tightly interconnected with the immune response.

240

## 241 **5. Conclusions**

242 The alterations of various proteins in SARS-CoV-2 infected patients' naso-oropharyngeal  
243 samples depict the molecular changes that govern the host antiviral defense system. The  
244 available literature for many respiratory diseases are very helpful in linking altered protein  
245 expressions to viral pathogenesis. Obtained data provided us an important view of SARS-  
246 CoV-2 molecular changes on the protein level in the infection site. Statistically significant  
247 protein alterations of PRTN3, MPO, ELANE, CTSG, AZU1, and TCN1 dysregulation is  
248 important in the early phases of infection and may be targets for anti-SARS-CoV-2  
249 therapeutics. Further research may show a link between the level of these proteins with  
250 disease severity and may be used as prognostic markers. Modulating the dysregulated proteins  
251 like PRTN3 or MPO may promote an anti-inflammatory response to alleviate SARS-CoV-2  
252 symptoms. Also targeting NETs to dampen the out-of-control host response as a treatment  
253 may increase the survival rate by reducing the number of patients who require mechanical  
254 ventilation in ICU. We posit here that excess NETs may elicit the severe multi-organ

255 consequences of COVID-19 via their known effects on tissues and the immune, vascular, and  
256 coagulation systems. Targeting NSPs and NETs in COVID-19 patients should therefore be  
257 considered by the biomedical community.

258

## 259 **Funding**

260 No specific funding was received from profit or non-profit organizations.

261

## 262 **Credit authorship contribution statement**

263 All authors have contributed to the study design and execution of the methodology. Sample  
264 collection, data acquisition, and data processing was done by Ahmet Tarik Baykal, Mete Bora  
265 Tuzuner, Emel Akgun, Betul Sahin, Mustafa Serteser, Ibrahim Unsal, Meltem Kilercik,  
266 Canan Kulah and Hacer Nur Cakiroglu. All authors have contributed and approved the  
267 manuscript.

268

## 269 **Conflict of Interest/Disclosure Statement**

270 The authors have declared no conflict of interest.

271

## 272 **Abbreviations**

273 CE, collision energy; DIA, data-independent acquisition; FA, formic acid; UPLC, Ultra  
274 performance liquid chromatography; UPX, Universal protein extraction kit.

## 275 **Appendix A. Supplementary data**

276 Supplementary Table 1. Protein quantification data

277 Supplementary Table 2. Protein identification data

278

## 279 **References**

- 280 [1] Busra Gurel, Mehmet Cansev, Cansu Koc, Busra Ocalan, Aysen Cakir, Sami Aydin, Nevzat Kahveci, Ismail  
281 H Ulus, Betul Sahin, Merve Karayel Basar, Ahmet Tarik Baykal (2019). Proteomics Analysis of CA1 Region of  
282 the Hippocampus in Pre-, Progression and Pathological Stages in a Mouse Model of the Alzheimer's Disease.  
283 Curr Alz Res. <http://doi: 10.2174/1567205016666190730155926>  
284
- 285 [2] Moseley MA, Hughes CJ, Juvvadi PR, Soderblom EJ, Lennon S, Perkins SR, Thompson JW, Steinbach WJ,  
286 Geromanos SJ, Wildgoose J, Langridge JI, Richardson K, Vissers JPC (2018). Scanning quadrupole data-  
287 independent acquisition, part A: qualitative and quantitative characterization. J Proteome Res.  
288 <https://doi.org/10.1021/acs.jproteome.7b00464>  
289
- 290 [3] Jeremy V. Camp and Colleen B. Jonsson (2017). A Role for Neutrophils in Viral Respiratory Disease. Front  
291 Immunol. <https://doi: 10.3389/fimmu.2017.00550>  
292
- 293 [4] Sean Quan Du , Weiming Yuan (2020). Mathematical Modeling of Interaction between Innate and Adaptive  
294 Immune Responses in COVID-19 and Implications for Viral Pathogenesis. J of Med Vir.  
295 <https://doi.org/10.1002/jmv.25866>  
296
- 297 [5] Kathleen D. Metzler, Christian Goosmann, Aleksandra Lubojemska, Arturo Zychlinsky, and Venizelos  
298 Papayannopoulos (2014). A Myeloperoxidase-Containing Complex Regulates Neutrophil Elastase Release and  
299 Actin Dynamics during NETosis. Cell Rep. <https://doi: 10.1016/j.celrep.2014.06.044>  
300
- 301 [6] Mahalakshmi Ramadass and Sergio D Catz (2016). Molecular mechanisms regulating secretory organelles  
302 and endosomes in neutrophils and their implications for inflammation. Immunol Rev. [https://doi:](https://doi: 10.1111/imr.12452)  
303 [10.1111/imr.12452](https://doi: 10.1111/imr.12452)  
304
- 305 [7] Sengeløv H, Kjeldsen L, Borregaard N (1993). Control of exocytosis in early neutrophil activation. J  
306 Immunol. 15;150(4):1535-43  
307

- 308 [8] K A Joiner, T Ganz, J Albert, D Rotrosen (1989). The opsonizing ligand on *Salmonella typhimurium*  
309 influences incorporation of specific, but not azurophil, granule constituents into neutrophil phagosomes. *J Cell*  
310 *Biol.* <https://doi.org/10.1083/jcb.109.6.2771>  
311
- 312 [9] Kai Kessenbrock, Leopold Fröhlich, Michael Sixt, Tim Lämmermann, Heiko Pfister, Andrew Bateman,  
313 Azzaq Belaouaj, Johannes Ring, Markus Ollert, Reinhard Fässler, and Dieter E. Jenne (2008). Proteinase 3 and  
314 neutrophil elastase enhance inflammation in mice by inactivating antiinflammatory progranulin. *J Clin Invest.*  
315 <https://doi: 10.1172/JCI34694>  
316
- 317 [10] V´eronique Witko-Sarsat Nathalie Thieblemont (2017). Granulomatosis with polyangiitis (Wegener  
318 granulomatosis): a proteinase-3 driven disease? *Joint Bone Spine.*  
319 <http://dx.doi.org/doi:10.1016/j.jbspin.2017.05.004>  
320
- 321 [11] Seymour J. Klebanoff, Anthony J. Kettle, Henry Rosen, Christine C. Winterbourn, and William M. Nausee  
322 (2013). Myeloperoxidase: a front-line defender against phagocytosed microorganisms. *J Leukoc Biol.* [http://doi:](http://doi: 10.1189/jlb.0712349)  
323 [10.1189/jlb.0712349](http://doi: 10.1189/jlb.0712349)  
324
- 325 [12] Johannes Schulte-Pelkum, Antonella Radice, Gary L. Norman, Marcos López Hoyos, Gabriella Lakos,  
326 Carol Buchner, Lucile Musset, Makoto Miyara, Laura Stinton, and Michael Mahler (2014). Novel Clinical and  
327 Diagnostic Aspects of Antineutrophil Cytoplasmic Antibodies. *J Immun Res.*  
328 <http://dx.doi.org/10.1155/2014/185416>  
329
- 330 [13] Lise Halbwachs and Philippe Lesavr (2012). Endothelium-Neutrophil Interactions in ANCA-Associated  
331 Diseases. *J Am Soc Nephrol.* <http://doi: 10.1681/ASN.2012020119>  
332
- 333 [14] S Ohlsson, J Wieslander, and M Segelmark (2003). Increased circulating levels of proteinase 3 in patients  
334 with anti-neutrophilic cytoplasmic autoantibodies-associated systemic vasculitis in remission. *Clin Exp*  
335 *Immunol.* <http://doi: 10.1046/j.1365-2249.2003.02083.x>  
336

- 337 [15] Witko-Sarsat V, Reuter N, Mouthon L (2010). Interaction of proteinase 3 with its associated partners:  
338 implications in the pathogenesis of Wegener's granulomatosis. *Current opinion in rheumatology*. 22:1-7.  
339
- 340 [16] Lani Shochet, Stephen Holdsworth and A. Richard Kitching (2020). Animal Models of ANCA Associated  
341 Vasculitis. *Front. Immunol.* <https://doi.org/10.3389/fimmu.2020.00525>  
342
- 343 [17] Katherine R. Martin, Delphine Ohayona, and Véronique Witko-Sarsa (2015). Promoting apoptosis of  
344 neutrophils and phagocytosis by macrophages: novel strategies in the resolution of inflammation.  
345 *BIOMEDICAL INTELLIGENCE*. <https://doi.org/10.4414/smw.2015.14056>  
346
- 347 [18] Yumiko Oishi and Ichiro Manabe (2016). Macrophages in age-related chronic inflammatory diseases. *NPJ*  
348 *Aging Mech Dis.* <https://doi: 10.1038/npjamd.2016.18>  
349
- 350 [19] Mohamed Abdgawad, Åsa Pettersson, Lena Gunnarsson, Anders A. Bengtsson, Pierre Geborek, Lars  
351 Nilsson, Mårten Segelmark and Thomas Hellmark (2012). Decreased Neutrophil Apoptosis in Quiescent  
352 ANCA-Associated Systemic Vasculitis. *PLoS One*. <https://doi: 10.1371/journal.pone.0032439>  
353
- 354 [20] Pascale Tacnet-Delorme, Julie Gabillet, Simon Chatfield, Nathalie Thieblemont, Philippe Frachet and  
355 Véronique Witko-Sarsat (2018). Proteinase 3 interferes With c1q-Mediated clearance of apoptotic cells. *Fron.*  
356 *Immun.* <https://doi: 10.3389/fimmu.2018.00818>  
357
- 358 [21] Tobias A. Fuchs, Ulrike Abed, Christian Goosmann, Robert Hurwitz, Ilka Schulze, Volker Wahn, Yvette  
359 Weinrauch, Volker Brinkmann, Arturo Zychlinsky (2007). Novel cell death program leads to neutrophil  
360 extracellular traps. *JCB*. <https://doi.org/10.1083/jcb.200606027>  
361
- 362 [22] Brinkmann V, Reichard U, Goosmann C, Fauler B, Uhlemann Y, Weiss DS, Weinrauch Y, Zychlinsky A.  
363 (2004). Neutrophil extracellular traps kill bacteria. *Science*. <https://DOI: 10.1126/science.1092385>  
364

- 365 [23] Yanbao Yu, Keehwan Kwon, Tamara Tsitrin, Shiferaw Bekele, Patricia Sikorski, Karen E. Nelson, and  
366 Rembert Pieper (2017). Characterization of Early-Phase Neutrophil Extracellular Traps in Urinary Tract  
367 Infections. *PLoS Pathog.* [https://doi: 10.1371/journal.ppat.1006151](https://doi.org/10.1371/journal.ppat.1006151)  
368
- 369 [24] Brice Korkmaz, Marshall S. Horwitz, Dieter E. Jenne, and Francis Gauthier (2010). Neutrophil Elastase,  
370 Proteinase 3, and Cathepsin G as Therapeutic Targets in Human Diseases. *Pharmacol Rev.* [https://doi:](https://doi.org/10.1124/pr.110.002733)  
371 [10.1124/pr.110.002733](https://doi.org/10.1124/pr.110.002733)  
372
- 373 [25] Kalupov T, Brillard-Bourdet M, Dadé S, Serrano H, Wartelle J, Guyot N, Juliano L, Moreau T, Belaaouaj  
374 A, Gauthier F (2009). Structural characterization of mouse neutrophil serine proteases and identification of their  
375 substrate specificities: relevance to mouse models of human inflammatory diseases. *J Biol Chem.* [https://doi:](https://doi.org/10.1074/jbc.M109.042903)  
376 [10.1074/jbc.M109.042903](https://doi.org/10.1074/jbc.M109.042903)  
377
- 378 [26] Almansa R, Socias L, Sanchez-Garcia M, Martín-Loeches I, del Olmo M, Andaluz-Ojeda D, Bobillo F,  
379 Rico L, Herrero A, Roig V, San-Jose CA, Rosich S, Barbado J, Disdier C, de Lejarazu RO, Gallegos MC,  
380 Fernandez V, Bermejo-Martin JF (2012). Critical COPD respiratory illness is linked to increased transcriptomic  
381 activity of neutrophil proteases genes. *BMC Res Notes.* [https://doi: 10.1186/1756-0500-5-401](https://doi.org/10.1186/1756-0500-5-401)  
382
- 383 [27] Lafuma C, Frisdal E, Harf A, Robert L, Hornebeck W (1991). Prevention of leucocyte elastase-induced  
384 emphysema in mice by heparin fragments. *Eur Respir J.* 4(8):1004-9.  
385
- 386 [28] Raquel Almansa, Lorenzo Socias, Monica Sanchez-Garcia, Ignacio Martín-Loeches, Milagros del Olmo,  
387 David Andaluz-Ojeda, Felipe Bobillo, Lucia Rico, Agueda Herrero, Vicente Roig, C Alicia San-Jose, Sara  
388 Rosich, Julia Barbado,8 Carlos Disdier, Raúl Ortiz de Lejarazu, Maria C Gallegos, Victoria Fernandez, and  
389 Jesus F Bermejo-Martin (2012). Critical COPD respiratory illness is linked to increased transcriptomic activity  
390 of neutrophil proteases genes. *BMC Res Notes.* [https://doi: 10.1186/1756-0500-5-401](https://doi.org/10.1186/1756-0500-5-401)  
391
- 392 [29] G Döring, F Frank, C Boudier, S Herbert, B Fleischer and G Bellon (1995). Cleavage of lymphocyte  
393 surface antigens CD2, CD4, and CD8 by polymorphonuclear leukocyte elastase and cathepsin G in patients with  
394 cystic fibrosis. *J Immunol.* 154 (9) 4842-4850

395

396 [30] Mario Cazzola, Daiana Stolz, Paola Rogliani, Maria Gabriella Matera (2020).  $\alpha$ 1-Antitrypsin deficiency and  
397 chronic respiratory disorders. *European Respiratory Review*. <https://DOI: 10.1183/16000617.0073-2019>

398

399 [31] Ken R BrackeDidier CataldoTania MaesTania MaesShow all 8 authorsRomain A Pauwels (2005). Matrix  
400 Metalloproteinase-12 and Cathepsin D Expression in Pulmonary Macrophages and Dendritic Cells of Cigarette  
401 Smoke-Exposed Mice. *International Archives of Allergy and Immunology*. <https://DOI: 10.1159/000088439>

402

403 [32] Di Stefano A, Caramori G, Ricciardolo FL, Capelli A, Adcock IM, Donner CF (2004). Cellular and  
404 molecular mechanisms in chronic obstructive pulmonary disease: an overview. *Clin Exp Allergy*. [https://doi:](https://doi: 10.1111/j.1365-2222.2004.02030.x)  
405 [10.1111/j.1365-2222.2004.02030.x](https://doi: 10.1111/j.1365-2222.2004.02030.x)

406

407 [33] Sugamata R, Dobashi H, Nagao T, Yamamoto K, Nakajima N, Sato Y, Aratani Y, Oshima M, Sata T,  
408 Kobayashi K, Kawachi S, Nakayama T, Suzuki K (2012). Contribution of neutrophil-derived myeloperoxidase  
409 in the early phase of fulminant acute respiratory distress syndrome induced by influenza virus infection.  
410 *Microbiol Immunol*. <https://doi: 10.1111/j.1348-0421.2011.00424.x>.

411

412 [34] Daniela Novick, Menachem Rubinstein, Tania Azam, Aharon Rabinkov, Charles A. Dinarello, and Soo-  
413 Hyun Kim (2006). Proteinase 3 is an IL-32 binding protein. *PNAS*. <https://doi.org/10.1073/pnas.0511206103>

414

415 [35] Monica Guma, Lisa Ronacher, Ru Liu-Bryan, Shinji Takai, Michael Karin and Maripat Corr, M (2009).  
416 Caspase-1 Independent IL-1 $\beta$  Activation in Neutrophil Dependent Inflammation. *Arthritis Rheum*. [https://doi:](https://doi: 10.1002/art.24959)  
417 [10.1002/art.24959](https://doi: 10.1002/art.24959)

418

419 [36] Hella LukschMichael RomanowskiMichael RomanowskiOsvaldo CharaOsvaldo CharaShow all 26  
420 authorsAngela Rösen-WolffAngela Rösen-Wolff (2013). Naturally Occurring Genetic Variants of Human  
421 Caspase-1 Differ Considerably in Structure and the Ability to Activate Interleukin-1 $\beta$ . *Human Mutation*.  
422 <https://10.1002/humu.22169>

423



424 [37] Lalitha Srinivasan, Sarah Ahlbrand, and Volker Briken (2014). Interaction of Mycobacterium tuberculosis  
 425 with Host Cell Death Pathways. Cold Spring Harb Perspect Med. [https://doi: 10.1101/cshperspect.a022459](https://doi.org/10.1101/cshperspect.a022459)  
 426  
 427 [38] Marcus A Lawson, Robert H McCusker & Keith W Kelley (2013). Interleukin-1 beta converting enzyme is  
 428 necessary for development of depression-like behavior following intracerebroventricular administration of  
 429 lipopolysaccharide to mice. Journal of Neuroinflammation. [https://doi: 10.1186/1742-2094-10-54](https://doi.org/10.1186/1742-2094-10-54)  
 430  
 431 [39] Conti P, Ronconi G, Caraffa A, Gallenga CE, Ross R, Frydas I and Kritas SK (2020). Induction of pro-  
 432 inflammatory cytokines (IL-1 and IL-6) and lung inflammation by Coronavirus-19 (CoV-19 or SARS-CoV-2):  
 433 anti-inflammatory strategies. J Biol Regul Homeost Agents. [http://doi:10.23812/CONTI-E](http://doi.org/10.23812/CONTI-E)  
 434  
 435  
 436

| ACCESSION     | UNIQUE PEPTIDES | <i>P value</i> | FOLD CHANGE (POS/NEG) | DESCRIPTION                           |
|---------------|-----------------|----------------|-----------------------|---------------------------------------|
| <b>Q9BQE3</b> | 2               | 0.0234         | 0.41                  | Tubulin alpha-1C chain                |
| <b>P20160</b> | 4               | 0.0413         | 2.03                  | Azurocidin                            |
| <b>P01876</b> | 12              | 0.0073         | 2.04                  | Immunoglobulin heavy constant alpha 1 |
| <b>P29401</b> | 2               | 0.0337         | 2.10                  | Transketolase                         |
| <b>P09104</b> | 2               | 0.0075         | 2.11                  | Gamma-enolase                         |
| <b>P20061</b> | 3               | 0.0294         | 2.48                  | Transcobalamin-1                      |
| <b>P04004</b> | 2               | 0.0001         | 2.65                  | Vitronectin                           |
| <b>P02790</b> | 7               | 0.0000         | 2.71                  | Hemopexin                             |
| <b>P0DOX7</b> | 3               | 0.0127         | 2.83                  | Immunoglobulin kappa light chain      |
| <b>P08246</b> | 2               | 0.0035         | 2.91                  | Neutrophil elastase                   |
| <b>Q9UKL4</b> | 2               | 0.0011         | 3.18                  | Gap junction delta-2 protein          |
| <b>Q16695</b> | 2               | 0.0003         | 3.20                  | Histone H3.1t                         |
| <b>P01871</b> | 2               | 0.0003         | 3.44                  | Immunoglobulin heavy constant mu      |
| <b>P08311</b> | 3               | 0.0097         | 3.67                  | Cathepsin G                           |

|        |   |        |       |                 |     |
|--------|---|--------|-------|-----------------|-----|
| P05164 | 9 | 0.0050 | 3.72  | Myeloperoxidase |     |
| P00450 | 4 | 0.0020 | 5.06  | Ceruloplasmin   | 438 |
| P24158 | 2 | 0.0023 | 29.42 | Myeloblastin    | 438 |
|        |   |        |       |                 | 440 |
|        |   |        |       |                 | 440 |

441

442 Table 1. Significantly altered protein identification list.

443

444

445

446

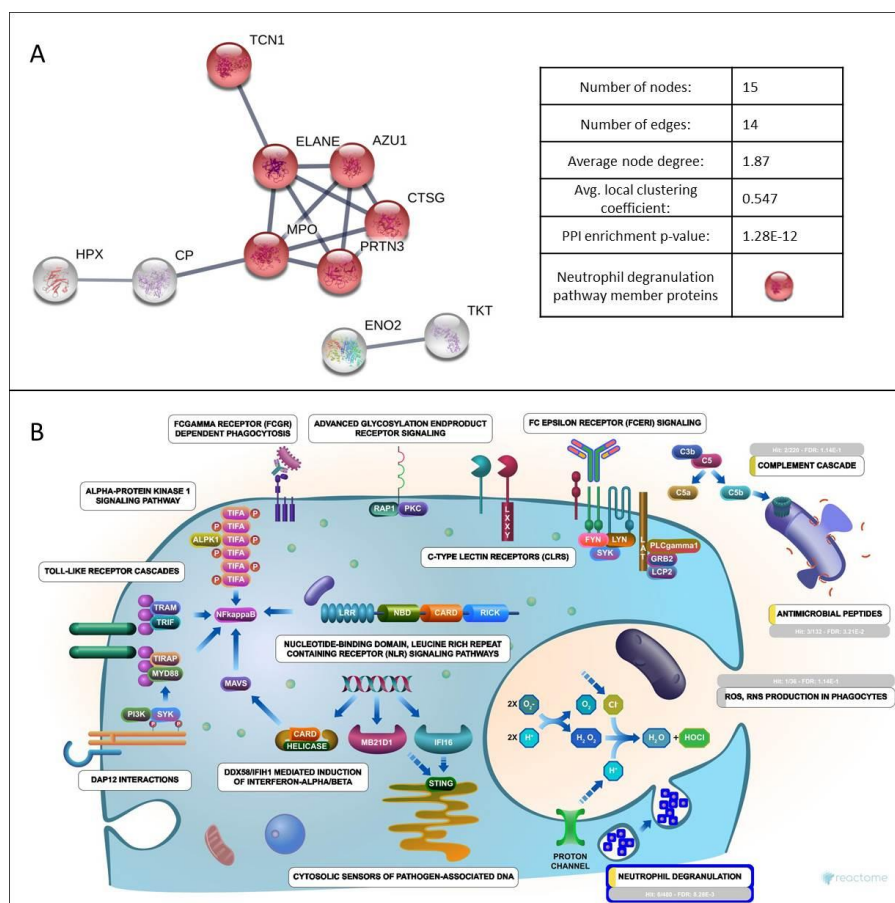

447

448

449 **Figure 1.** STRING and Reactome analysis of identified proteins. A- Protein-protein interaction network.

450 B- Diagram of Initiate Immune System pathway (HSA-168249, FDR=2.3E-5) from Reactome, showing a

451 significant enrichment for neutrophil degranulation pathway (HSA-6798695, FDR=2.01E-7) having the most

452 hits.
